# Supplementary material for: A passive flow regulator with low threshold pressure for high-throughput inertial isolation of microbeads
Source: Royal Society of Chemistry journal article supplement (doi:10.1039/c5lc00647c), 2015-01-01
Supplement: c5lc00647c1.pdf [file c5lc00647c1.pdf]

*Supplementary Material for:*

**A passive flow regulator with low threshold pressure for high-throughput  
inertial isolation of microbeads**

Xinjie Zhang, Nan Xiang, Wenlai Tang, Di Huang, Xin Wang, Hong Yi, and

Zhonghua Ni

**Supplementary data**

Table S1. The comparison results of our passive flow regulator with other previously reported regulators.

| <b>Regulator</b>             | <b>Fabrication Method</b> | <b>Max. constant Flow-rate (ml/min)</b> | <b>Operating Pressure (kPa)</b> | <b>Variation (%)</b> |
|------------------------------|---------------------------|-----------------------------------------|---------------------------------|----------------------|
| Silicon membrane valve [18]  | Dry etching               | 0.022                                   | 20                              | 5                    |
| Push-up valve [19] [20]      | Soft lithography          | 0.033                                   | 103                             | -                    |
| Parallel membrane valve [21] | Soft lithography          | 1.46                                    | 35                              | 5                    |
| Planar check valve [22]      | Soft lithography          | 1.2                                     | 100                             | 3                    |
| Our work                     | Soft lithography          | 4.38                                    | 15                              | 5                    |

Table S2. The measured available sheath, sample and total Dean flow-rates for achieving inertial isolation of 5  $\mu\text{m}$  and 15  $\mu\text{m}$  microbeads.

| Sheath flow-rate<br>(ml/min) | Sample flow-rate<br>(ml/min) | Total Dean flow-rate<br>(ml/min) |
|------------------------------|------------------------------|----------------------------------|
| 0.85                         | 0.05~0.4                     | 0.9~1.25                         |
| 0.9                          | 0.05~0.35                    | 0.95~1.25                        |
| 0.95                         | 0.05~0.3                     | 1~1.25                           |
| 1                            | 0.05~0.25                    | 1.05~1.25                        |
| 1.1                          | 0.05~0.2                     | 1.15~1.3                         |

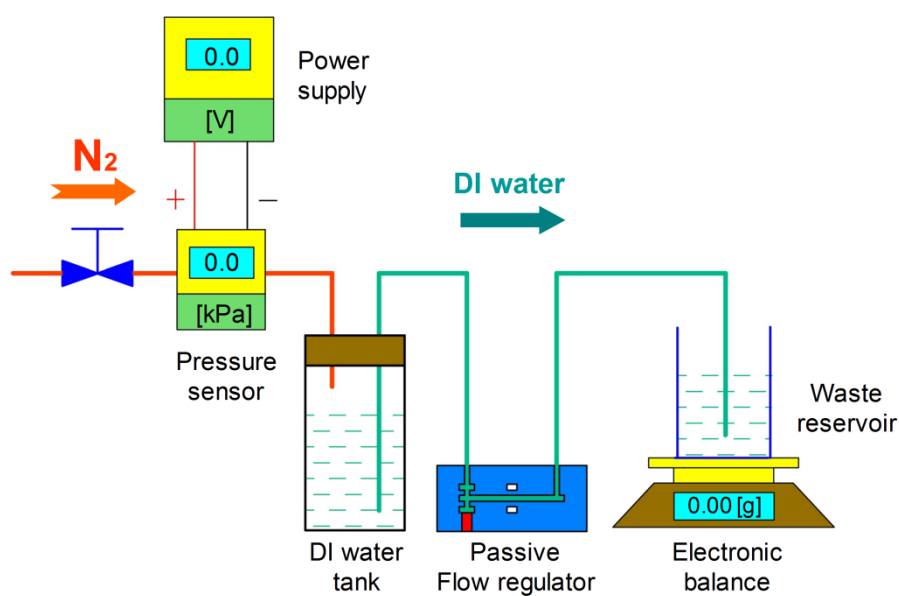

Fig. S1 Experimental setup for flow-rate measurement.

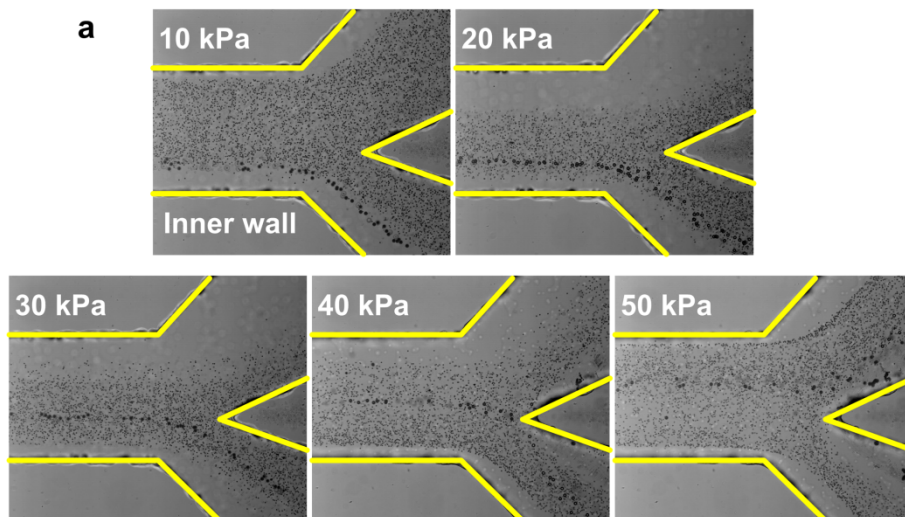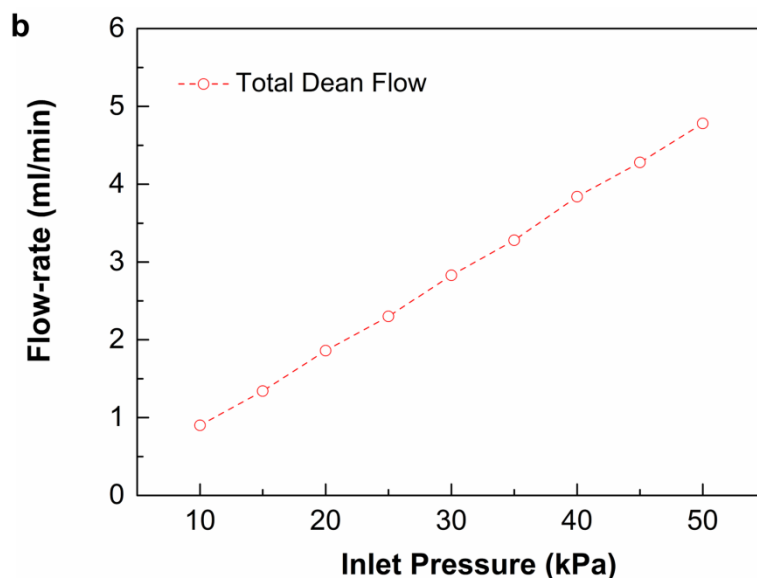

Fig. S2 Isolation performances of microbeads under varied gas pressures in the system without regulators. (a) Composite images illustrating microbead distributions near the outlets under the pressures ranging from 10 kPa to 50 kPa. (b) The measured total Dean flow-rates as a function of inlet pressures.
